# Supplementary material for: SARS-CoV-2 antibody magnitude and detectability are driven by disease severity, timing, and assay
Source: PubMed Central journal article supplement (PMC7941652; doi:10.1101/2021.03.03.21251639), 2021-03-05

Raw data

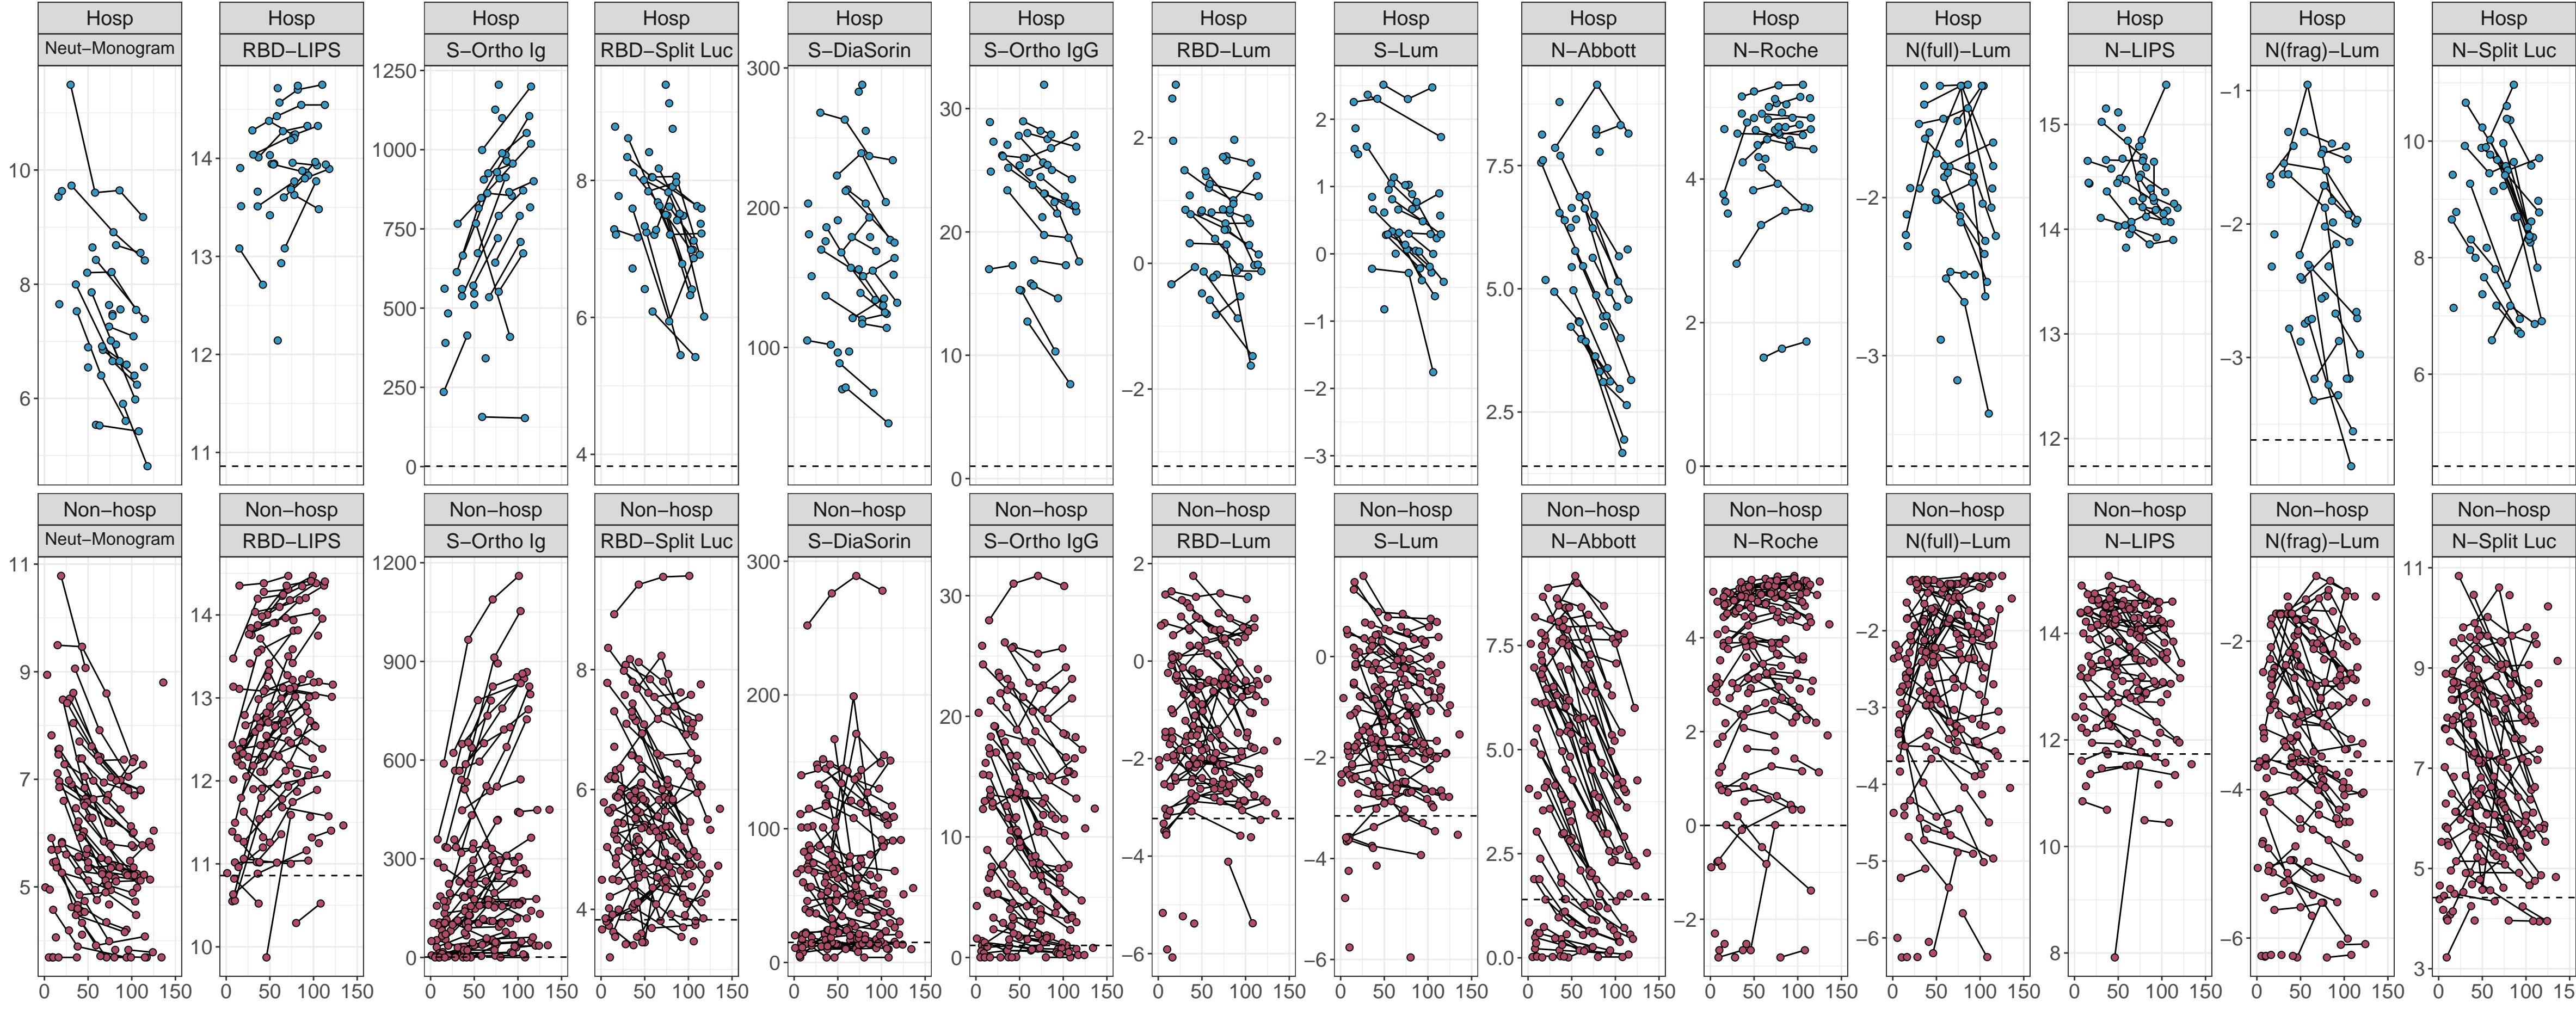

Supplement: media-8.pdf [file media-8.pdf]
