# Supplementary material for: SARS-CoV-2 antibody magnitude and detectability are driven by disease severity, timing, and assay
Source: bioRxiv or medRxiv preprint supplement (doi:10.1101/2021.03.03.21251639), 2021-03-05

**A**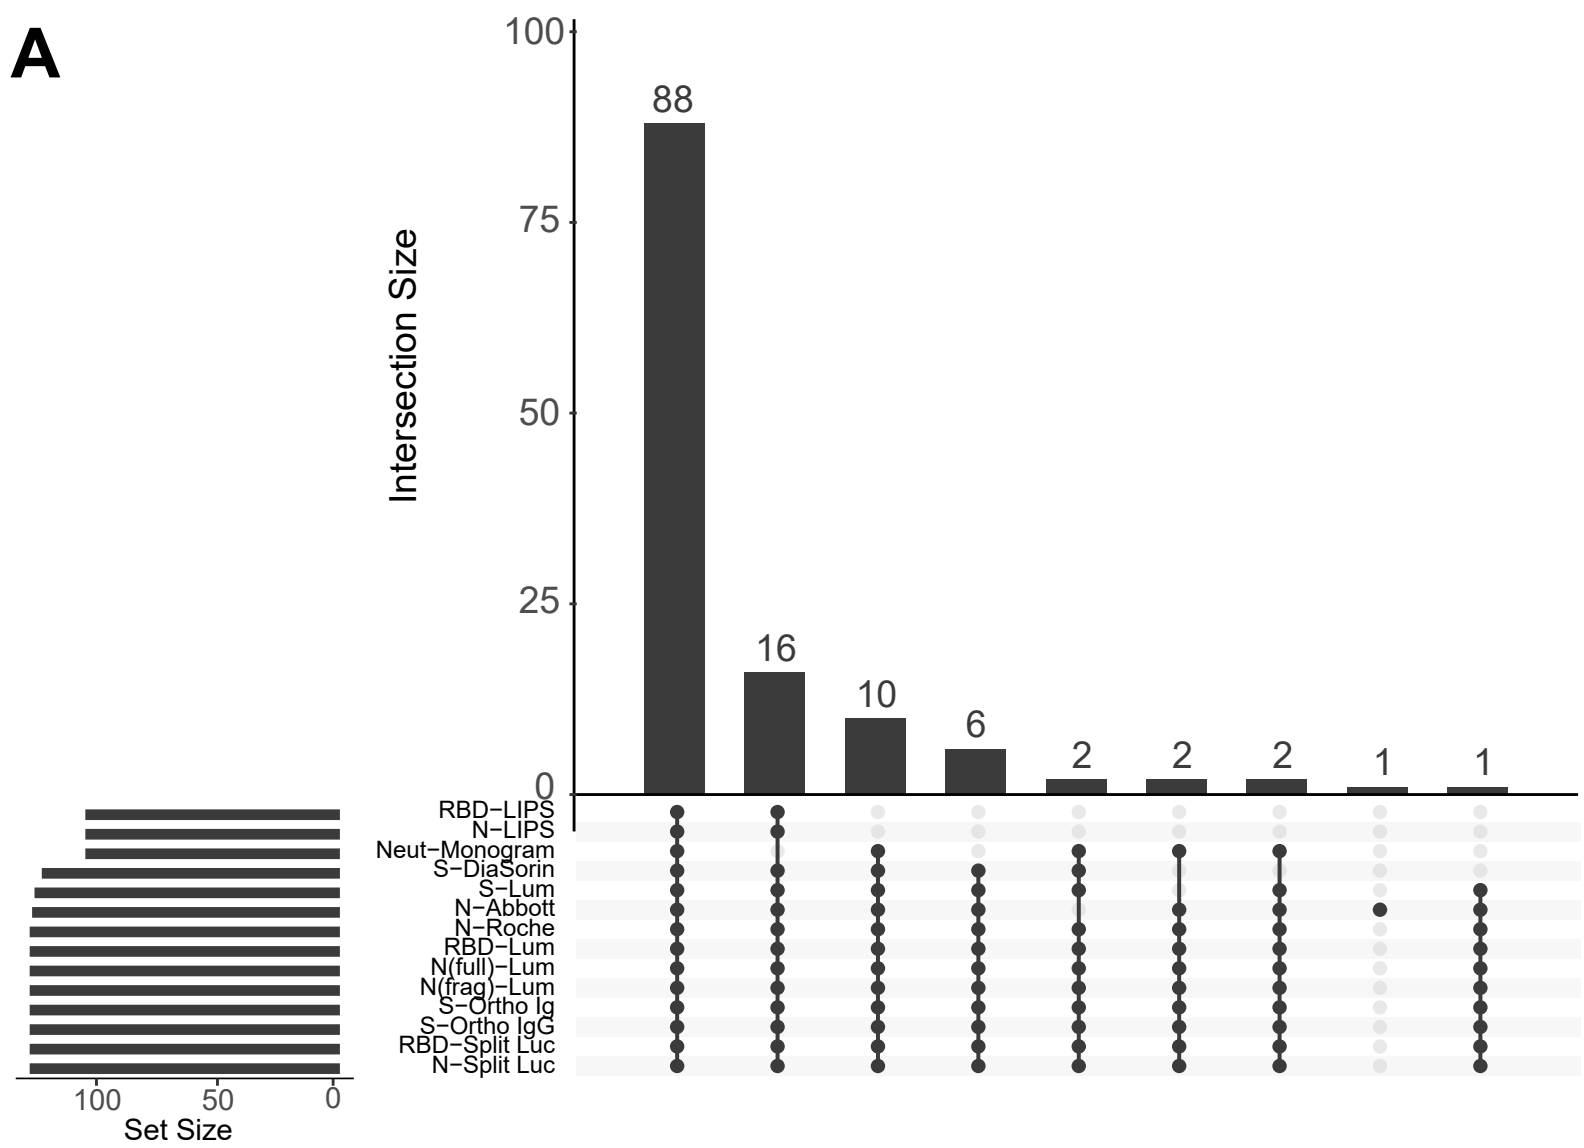**B**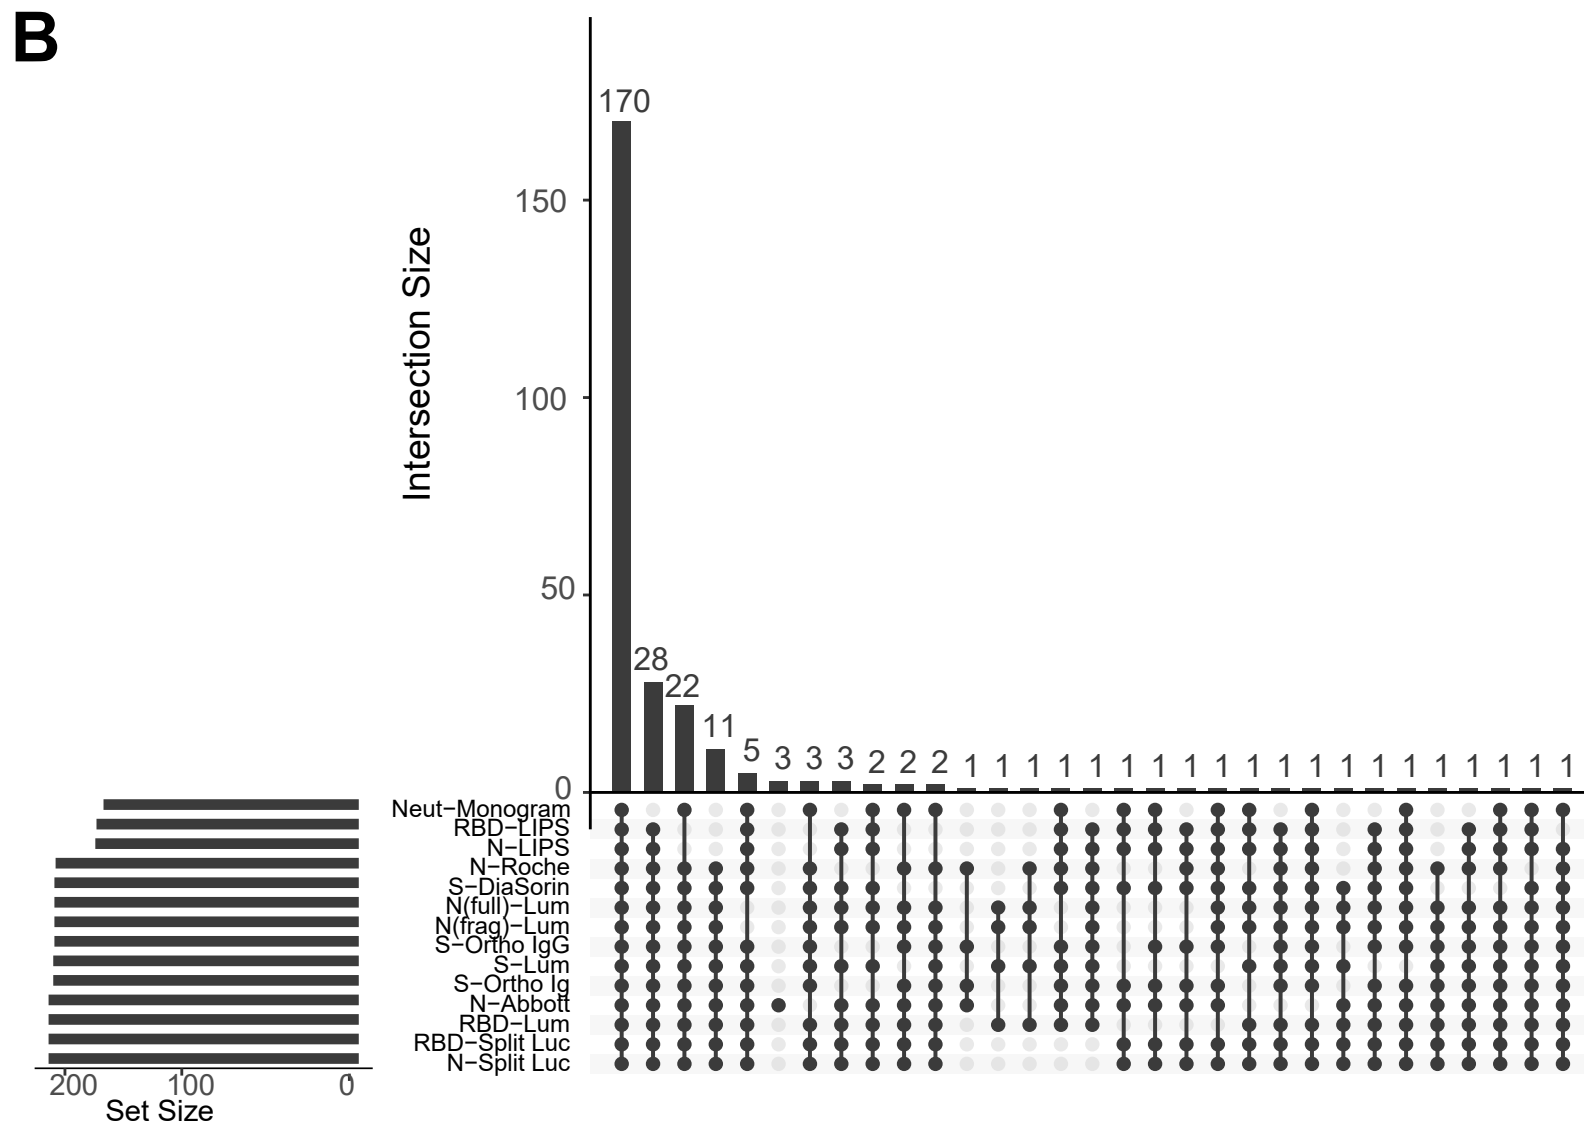

Supplement: Supplementary file [file media-2.pdf]
